# Supplementary material
Source: MDPI journal article supplement (https://www.mdpi.com/1424-2818/15/9/957)
Supplement: s1 [file s1]

**Table S1.** Plant species of Dibbeen Forest Reserve, specifically in zones A-G.

| Plant species                                                                          | Zone A | Zone B | Zone C | Zone D | Zone E | Zone F | Zone G |
|----------------------------------------------------------------------------------------|--------|--------|--------|--------|--------|--------|--------|
| <i>Achillea arabica</i> Kotschy                                                        |        |        |        |        |        | ×      | ×      |
| <i>Achillea cretica</i> L.                                                             |        |        |        |        |        | ×      |        |
| <i>Adonis annua</i> L.                                                                 |        |        |        | ×      |        |        |        |
| <i>Adonis dentata</i> Delile                                                           |        |        |        |        | ×      |        |        |
| <i>Adonis palaestina</i> Boiss.                                                        |        |        |        |        |        | ×      |        |
| <i>Aegilops geniculata</i> Roth                                                        |        |        |        | ×      | ×      | ×      |        |
| <i>Aegilops peregrina</i> (Hack.) Maire & Weiller                                      |        |        |        |        |        |        | ×      |
| <i>Ainsworthia trachycarpa</i> Boiss.                                                  |        |        |        |        |        | ×      |        |
| <i>Ajuga chamaepitys</i> subsp. <i>chia</i> (Schreb.) Arcang.                          | ×      |        | ×      | ×      | ×      | ×      |        |
| <i>Alcea acaulis</i> (Cav.) Alef.                                                      |        |        |        |        |        | ×      |        |
| <i>Alkanna tinctoria</i> (L.) Tausch                                                   |        | ×      |        | ×      |        |        |        |
| <i>Allium neapolitanum</i> Cirillo                                                     |        |        |        |        |        | ×      |        |
| <i>Alyssum damascenum</i> Boiss. & Gaill.                                              |        |        | ×      |        |        | ×      |        |
| <i>Anacamptis papilionacea</i> (L.) R.M.Bateman,<br><del>Bridson &amp; M.W.Chase</del> |        | ×      |        |        |        |        |        |
| <i>Anagallis arvensis</i> L.                                                           | ×      | ×      | ×      |        |        |        |        |
| <i>Anchusa aegyptiaca</i> (L.) A.DC.                                                   | ×      |        | ×      | ×      |        | ×      |        |
| <i>Anemone coronaria</i> L.                                                            | ×      |        | ×      | ×      |        |        |        |
| <i>Anthemis hebronica</i> Boiss. & Kotschy                                             |        |        | ×      |        |        | ×      |        |
| <i>Anthemis maris-mortui</i> Eig                                                       |        |        |        | ×      |        |        |        |
| <i>Arabis aucheri</i> Boiss.                                                           |        |        |        | ×      |        | ×      |        |
| <i>Arabis turrita</i> L.                                                               |        |        |        |        |        | ×      |        |
| <i>Arabis verna</i> (L.) R.Br.                                                         |        |        |        |        | ×      | ×      |        |
| <i>Arbutus andrachne</i> L.                                                            | ×      | ×      |        |        | ×      |        | ×      |
| <i>Arum dioscoridis</i> Sm.                                                            |        |        |        | ×      |        | ×      |        |
| <i>Arum hygrophilum</i> Boiss.                                                         |        |        |        |        | ×      |        |        |
| <i>Arum palaestinum</i> Boiss.                                                         |        |        | ×      |        |        |        |        |
| <i>Asparagus aphyllus</i> L.                                                           |        |        |        |        |        | ×      |        |
| <i>Asphodelus aestivus</i> Brot.                                                       | ×      |        | ×      | ×      |        |        |        |
| <i>Asphodelus aestivus</i> Brot.                                                       |        |        | ×      | ×      |        |        |        |
| <i>Astomaea seselifolia</i> (A.DC.) Rauschert                                          |        |        |        | ×      |        |        |        |
| <i>Astragalus corrugatus</i> Bertol.                                                   | ×      |        |        | ×      |        |        |        |
| <i>Astragalus epiglottis</i> L.                                                        |        |        |        |        |        |        | ×      |
| <i>Astragalus palaestinus</i> var. <i>jordanensis</i> (Eig) Podl.                      |        |        |        |        |        | ×      |        |
| <i>Astragalus pelecinus</i> (L.) Barneby                                               |        |        |        |        |        |        | ×      |
| <i>Astragalus schimperi</i> Boiss.                                                     |        |        |        |        |        | ×      |        |
| <i>Avena sterilis</i> L.                                                               | ×      | ×      |        |        |        |        |        |
| <i>Avena wiestii</i> Steudel                                                           |        |        | ×      |        |        |        |        |
| <i>Ballota saxatilis</i> Sieber ex C.Presl                                             |        |        |        | ×      |        |        |        |
| <i>Ballota undulata</i> (Sieber ex Fresen.) Benth.                                     |        |        |        |        |        | ×      |        |
| <i>Bellevia flexuosa</i> Boiss.                                                        | ×      |        | ×      | ×      |        |        |        |
| <i>Bifora testiculata</i> (L.) Roth                                                    |        |        |        |        |        | ×      |        |
| <i>Biscutella didyma</i> L.                                                            |        | ×      | ×      | ×      | ×      | ×      | ×      |
| <i>Bituminaria bituminosa</i> (L.) C.H.Stirt.                                          |        |        |        | ×      |        |        |        |
| <i>Bituminaria flaccida</i> (Nábělek) Greuter                                          |        |        |        |        |        | ×      |        |
| <i>Brachypodium distachyon</i> (L.) P.Beauv.                                           |        |        |        | ×      | ×      |        |        |
| <i>Brassica nigra</i> (L.) K.Koch                                                      |        |        |        |        |        | ×      |        |
| <i>Bromus diandrus</i> Roth                                                            |        |        | ×      |        |        |        |        |
| <i>Bromus fasciculatus</i> C.Presl                                                     | ×      |        |        |        |        |        |        |
| <i>Bromus madritensis</i> L. subsp. <i>Madritensis</i>                                 |        |        | ×      |        |        |        | ×      |

|                                                                   |   |   |   |   |   |   |   |
|-------------------------------------------------------------------|---|---|---|---|---|---|---|
| <i>Bromus rigidus</i> Roth                                        |   |   |   |   | × |   |   |
| <i>Bromus rubens</i> L.                                           |   |   |   | × |   |   |   |
| <i>Bromus scoparius</i> L.                                        |   | × |   |   |   | × |   |
| <i>Bromus sterilis</i> L.                                         |   |   |   |   |   | × |   |
| <i>Bromus tectorum</i> L.                                         |   |   |   | × |   | × |   |
| <i>Bryonia cretica</i> L.                                         |   |   |   |   |   | × |   |
| <i>Buglossoides tenuiflora</i> (L.f.) I.M.Johnst.                 | × |   |   |   |   | × |   |
| <i>Calendula arvensis</i> M.Bieb.                                 | × |   | × |   |   |   |   |
| <i>Calepina irregularis</i> (Asso) Thell                          |   |   | × |   |   |   |   |
| <i>Calicotome villosa</i> (Poir.) Link                            |   | × |   | × |   |   |   |
| <i>Campanula erinus</i> L.                                        |   |   |   | × | × |   |   |
| <i>Carduus argentatus</i> L.                                      |   |   |   |   | × |   |   |
| <i>Carduus getulus</i> Pomel                                      |   | × |   |   |   |   |   |
| <i>Carduus nigrescens</i> subsp. <i>australis</i> (Nyman) Greuter |   |   |   |   |   | × |   |
| <i>Carlina hispanica</i> Lam.                                     |   |   |   | × | × |   |   |
| <i>Catananche lutea</i> L.                                        |   |   |   |   |   | × |   |
| <i>Centaurea iberica</i> Trevir. ex Spreng.                       |   |   | × |   | × | × |   |
| <i>Centaurea</i> sp                                               |   |   |   | × |   |   |   |
| <i>Cephalanthera longifolia</i> (L.) Fritsch                      |   | × |   |   |   | × |   |
| <i>Cerastium dichotomum</i> L.                                    |   |   | × |   |   | × |   |
| <i>Ceratocarpus turbinata</i> (DC.) Lidén                         |   |   |   |   |   | × |   |
| <i>Ceratonia siliqua</i> L.                                       |   |   | × | × |   |   |   |
| <i>Ceterach officinarum</i> Willd.                                |   |   |   |   |   | × |   |
| <i>Chaetosciadium trichospermum</i> (L.) Boiss.                   |   |   |   |   | × | × |   |
| <i>Chiliadenus iphionoides</i> (Boiss. & Blanche) Brullo          | × |   |   |   | × |   |   |
| <i>Cichorium pumilum</i> Jacq.                                    |   |   |   | × |   |   | × |
| <i>Cistus creticus</i> L.                                         |   |   |   | × |   |   |   |
| <i>Cistus salviifolius</i> L.                                     | × | × | × | × | × |   | × |
| <i>Clematis cirrhosa</i> L.                                       |   |   |   | × |   | × | × |
| <i>Clypeola jonthlaspi</i> L.                                     |   | × | × | × | × | × | × |
| <i>Convolvulus arvensis</i> L.                                    |   |   |   | × |   |   |   |
| <i>Convolvulus pentapetaloides</i> L.                             |   |   |   | × |   |   |   |
| <i>Convolvulus siculus</i> L.                                     | × |   |   |   | × |   |   |
| <i>Coronilla scorpioides</i> K. Koch                              |   |   |   | × |   |   |   |
| <i>Cota palaestina</i> Reut. ex Unger & Kotschy                   |   | × |   |   |   |   |   |
| <i>Crambe hispanica</i> L.                                        |   |   |   |   |   | × |   |
| <i>Crataegus azarolus</i> var. <i>aronia</i> L.                   |   |   | × | × |   | × | × |
| <i>Crepis hierosolymitana</i> Boiss.                              |   |   | × |   |   | × |   |
| <i>Crepis senecioides</i> Delile                                  |   |   | × |   |   |   |   |
| <i>Cruciata articulata</i> (L.) Ehrend.                           |   |   |   |   |   | × |   |
| <i>Crupina crupinastrum</i> (Moris) Vis.                          | × |   | × | × |   |   |   |
| <i>Cyclamen persicum</i> Mill.                                    | × |   | × | × | × |   |   |
| <i>Cynosurus echinatus</i> L.                                     | × |   |   |   |   | × |   |
| <i>Cynosurus elegans</i> Desf.                                    | × | × |   | × |   |   |   |
| <i>Drimia maritima</i> (L.) Stearn                                | × |   | × | × |   |   |   |
| <i>Erodium acaule</i> (L.) Bech. & Thell.                         |   | × |   |   |   |   |   |
| <i>Erodium gruinum</i> (L.) L' Hér.                               |   |   | × |   |   | × |   |
| <i>Erodium laciniatum</i> (Cav.) Willd.                           | × |   |   | × |   |   |   |
| <i>Erodium malacoides</i> (L.) L'Hér.                             | × |   |   |   |   | × |   |
| <i>Erodium subintegrifolium</i> Eig                               |   |   |   | × |   |   |   |
| <i>Erodium touchyanum</i> Delile ex Godr.                         |   |   | × |   |   |   |   |
| <i>Erodium trifolium</i> (Cav.) Guitt.                            | × |   |   |   |   | × |   |

|                                                                                                 |   |   |   |   |   |   |   |
|-------------------------------------------------------------------------------------------------|---|---|---|---|---|---|---|
| <i>Eruca vesicaria</i> (L.) Cav.                                                                |   |   |   | × |   |   |   |
| <i>Eryngium creticum</i> Lam.                                                                   | × |   |   | × |   | × |   |
| <i>Euphorbia aulacosperma</i> Boiss.                                                            |   |   |   | × |   |   |   |
| <i>Euphorbia densa</i> Schrenk                                                                  |   |   |   |   |   |   | × |
| <i>Euphorbia exigua</i> L.                                                                      |   |   |   | × |   |   |   |
| <i>Euphorbia helioscopia</i> L.                                                                 |   |   |   | × |   |   |   |
| <i>Euphorbia peplus</i> L.                                                                      | × | × |   |   |   | × |   |
| <i>Fibigia clypeata</i> (L.) Medik.                                                             |   |   |   |   |   | × |   |
| <i>Filago contracta</i> (Boiss.) Chrtek & Holub                                                 | × |   |   | × |   |   |   |
| <i>Filago eriocephala</i> Guss.                                                                 |   |   |   |   | × | × |   |
| <i>Filago gallica</i> (L.) L.                                                                   |   |   |   |   | × |   |   |
| <i>Filago pyramidata</i> L.                                                                     |   | × |   | × |   |   |   |
| <i>Fumana arabica</i> (L.) Spach                                                                | × | × |   | × | × |   |   |
| <i>Gagea villosa</i> (M.Bieb.) Sweet                                                            |   |   | × |   |   |   |   |
| <i>Galium aparine</i> L.                                                                        |   |   |   |   |   | × |   |
| <i>Galium judaicum</i> Boiss.                                                                   |   |   |   |   |   | × |   |
| <i>Galium murale</i> (L.) All.                                                                  | × | × |   | × |   |   |   |
| <i>Galium philistaeum</i> Boiss.                                                                |   |   |   | × |   |   |   |
| <i>Geranium molle</i> L.                                                                        | × | × | × | × | × | × |   |
| <i>Geranium rotundifolium</i> L.                                                                |   |   |   |   |   |   | × |
| <i>Gynandrisis sisyrinchium</i> (L.) Parl.                                                      | × | × |   | × |   | × |   |
| <i>Hedypnois rhagadioloides</i> (L.) F.W.Schmidt                                                |   |   |   | × |   |   |   |
| <i>Helianthemum salicifolium</i> (L.) Mill.                                                     | × |   | × | × |   |   |   |
| <i>Helichrysum sanguineum</i> (L.) Kostel.                                                      |   |   |   | × | × |   |   |
| <i>Herniaria hirsuta</i> L.                                                                     |   | × |   |   |   |   |   |
| <i>Hippocrepis unisiliquosa</i> L.                                                              |   |   |   |   |   | × |   |
| <i>Hirschfeldia incana</i> (L.) Lagr.-Foss.                                                     |   | × |   |   |   |   |   |
| <i>Hordeum murinum</i> subsp. <i>glaucum</i> (Steud.) Tzvelev                                   |   |   |   | × |   | × |   |
| <i>Hordeum spontaneum</i> K.Koch                                                                |   |   |   |   | × |   |   |
| <i>Hymenocarpus circinnatus</i> (L.) Savi                                                       | × | × |   | × | × |   |   |
| <i>Hyoseris scabra</i> L.                                                                       | × |   |   |   |   |   | × |
| <i>Hypocoum imberbe</i> Sm.                                                                     |   |   |   |   |   | × |   |
| <i>Hypericum triquetrifolium</i> Turra                                                          |   |   |   |   |   |   | × |
| <i>I. bismarckiana</i>                                                                          |   |   |   |   |   |   | × |
| <i>Lactuca tuberosa</i> Jacq.                                                                   |   |   |   |   |   |   | × |
| <i>Lactuca viminea</i> (L.) J.Presl & C.Presl                                                   |   |   |   |   | × |   |   |
| <i>Lagoecia cuminoides</i> L.                                                                   |   |   |   | × |   | × |   |
| <i>Lamium amplexicaule</i> L.                                                                   | × | × |   | × |   | × |   |
| <i>Lathyrus aphaca</i> L.                                                                       |   |   |   |   | × |   |   |
| <i>Lathyrus blepharicarpus</i> Boiss.                                                           |   |   |   |   |   | × | × |
| <i>Lathyrus cicera</i> L.                                                                       |   |   |   | × |   | × |   |
| <i>Lathyrus pseudocicera</i> subsp. <i>negevensis</i> (Plitmann) <del>Plitmann &amp; Ilan</del> |   |   |   |   |   | × |   |
| <i>Lecokia cretica</i> (Lam.) DC.                                                               |   |   |   |   |   | × |   |
| <i>Legousia falcata</i> (Ten.) Fritsch ex Janch.                                                |   |   |   | × | × |   | × |
| <i>Lens culinaris</i> subsp. <i>orientalis</i> (Boiss.) Ponert                                  |   | × |   | × |   |   |   |
| <i>Lens ervoides</i> (Brign.) Grande                                                            |   |   |   |   | × |   |   |
| <i>Leontodon tuberosus</i> L.                                                                   | × |   |   | × |   |   |   |
| <i>Lepidium draba</i> L.                                                                        |   |   |   |   | × |   |   |
| <i>Linaria micrantha</i> (Cav.) Hoffmanns. & Link                                               |   | × |   |   |   |   |   |
| <i>Linum pubescens</i> Banks & Sol.                                                             |   |   |   | × |   | × |   |
| <i>Linum strictum</i> L.                                                                        |   |   |   | × | × |   |   |
| <i>Lomelosia palaestina</i> (L.) Raf.                                                           |   |   |   |   |   |   | × |

|                                                                          |   |   |   |   |   |   |   |
|--------------------------------------------------------------------------|---|---|---|---|---|---|---|
| <i>Lotus longesiliquosus</i> R.Roem.                                     |   |   |   |   |   | × |   |
| <i>Lotus ormithopodioides</i> L.                                         | × |   | × | × |   |   |   |
| <i>Lotus peregrinus</i> L.                                               |   |   |   |   |   | × |   |
| <i>Lysimachia linum-stellatum</i> L.                                     |   |   |   | × |   |   |   |
| <i>Malcolmia chia</i> (L.) DC.                                           |   |   |   | × |   |   |   |
| <i>Mandragora officinalis</i> Mill.                                      |   |   |   | × |   |   |   |
| <i>Matthiola longipetala</i> (Vent.) DC.                                 |   |   |   |   |   | × |   |
| <i>Medicago coronata</i> (L.) Bartal.                                    | × |   |   | × |   | × |   |
| <i>Medicago granadensis</i> Willd.                                       |   |   |   |   |   | × |   |
| <i>Medicago littoralis</i> Loisel.                                       |   |   |   |   |   | × |   |
| <i>Medicago minima</i> (L.) L.                                           |   | × |   |   |   |   |   |
| <i>Medicago orbicularis</i> (L.) Bartal.                                 |   | × |   | × |   |   |   |
| <i>Medicago rotata</i> Boiss.                                            |   |   |   | × |   |   |   |
| <i>Mercurialis annua</i> L.                                              |   |   | × | × |   |   | × |
| <i>Micromeria nervosa</i> (Desf.) Benth.                                 | × |   |   | × |   |   | × |
| <i>Micropus supinus</i> L.                                               | × |   |   | × |   |   |   |
| <i>Minuartia decipiens</i> Bornm.                                        |   |   |   |   |   |   | × |
| <i>Minuartia globulosa</i> (Labill.) Schinz & Thell.                     |   |   |   |   | × |   |   |
| <i>Minuartia hybrida</i> (Vill.) Schischk.                               | × | × |   | × | × | × |   |
| <i>Minuartia meyeri</i> (Boiss.) Bornm.                                  |   |   |   | × |   |   |   |
| <i>Muscari commutatum</i> Guss.                                          | × |   | × | × |   |   |   |
| <i>Neslia paniculata</i> subsp. <i>thracica</i> (Velen.) Bornm.          |   | × |   |   |   |   |   |
| <i>Nigella ciliaris</i> DC.                                              |   |   |   | × |   |   |   |
| <i>Nonea melanocarpa</i> Boiss.                                          |   |   |   |   |   | × |   |
| <i>Nonea philistaea</i> Boiss.                                           |   |   | × |   |   |   |   |
| <i>Notobasis syriaca</i> (L.) Cass.                                      |   |   |   | × |   | × |   |
| <i>Onobrychis caput-galli</i> (L.) Lam.                                  |   |   |   |   | × |   |   |
| <i>Ononis alopecuroides</i> L.                                           |   |   |   |   |   | × |   |
| <i>Ononis natrix</i> L.                                                  |   |   |   |   |   | × |   |
| <i>Ononis ormithopodioides</i> L.                                        | × | × |   |   |   |   |   |
| <i>Ononis reclinata</i> L.                                               |   |   |   | × | × |   |   |
| <i>Ononis spinosa</i> L.                                                 |   |   |   | × |   |   |   |
| <i>Ononis viscosa</i> L.                                                 |   |   |   | × |   |   |   |
| <i>Onopordum jordanicola</i> Eig                                         |   |   |   |   |   | × |   |
| <i>Ophrys sphegodes</i> subsp. <i>mammosa</i> (Desf.) Soó ex F.Nelson    |   | × |   | × |   |   |   |
| <i>Orchis anatolica</i> Boiss.                                           |   |   | × |   |   |   |   |
| <i>Orchis galilaea</i> (Bornm. & M.Schulze) Schltr.                      |   |   |   |   |   | × |   |
| <i>Ornithogalum montanum</i> Cirillo                                     |   |   | × |   |   |   |   |
| <i>Ornithogalum narbonense</i> L.                                        | × |   |   | × | × |   |   |
| <i>Ornithogalum neurostegium</i> Boiss. & Blanche                        |   | × |   |   |   |   |   |
| <i>Ornithogalum neurostegium</i> subsp. <i>eigii</i> (Feinbrun) Feinbrun | × |   |   |   |   |   |   |
| <i>Ornithogalum trichophyllum</i> Boiss.                                 |   |   |   |   |   | × |   |
| <i>Papaver argemone</i> L.                                               |   |   |   |   |   | × |   |
| <i>Parentucellia flaviflora</i> (Boiss.) Nevski                          |   | × |   | × |   | × |   |
| <i>Parietaria diffusa</i> Mert. & Koch                                   |   |   |   |   |   | × |   |
| <i>Paronychia argentea</i> Lam.                                          |   |   |   | × |   | × |   |
| <i>Phagnalon rupestre</i> (L.) DC.                                       |   | × |   | × |   |   |   |
| <i>Phagnalon rupestre</i> (L.) DC.                                       |   | × |   | × |   |   |   |
| <i>Phlomis viscosa</i> Poir.                                             |   |   |   | × |   | × |   |
| <i>Picnemon acarna</i> (L.) Cass.                                        | × |   | × | × | × | × |   |
| <i>Picris cyanocarpa</i> Boiss.                                          |   |   |   |   | × |   |   |
| <i>Picris galilaea</i> (Boiss.) Eig                                      |   |   |   |   | × |   |   |

|                                                         |   |   |   |   |   |   |   |
|---------------------------------------------------------|---|---|---|---|---|---|---|
| <i>Pinus halepensis</i> Mill.                           |   | × |   |   |   |   |   |
| <i>Piptatherum blancheanum</i> Desv. ex Boiss.          |   |   |   |   |   | × |   |
| <i>Piptatherum holciforme</i> (M.Bieb.) Roem. & Schult. |   |   |   |   |   | × |   |
| <i>Piptatherum miliaceum</i> (L.) Coss.                 |   |   |   |   | × |   |   |
| <i>Pistacia palaestina</i> Boiss.                       |   | × |   | × |   |   |   |
| <i>Pisum fulvum</i> Sibth. & Sm.                        |   |   | × |   |   |   |   |
| <i>Pisum syriacum</i> (A.Berger) C.O.Lehm.              |   |   |   |   |   | × |   |
| <i>Plantago bellardii</i> All.                          | × |   |   |   | × |   |   |
| <i>Plantago cretica</i> L.                              |   |   |   | × |   |   |   |
| <i>Plantago indica</i> L.                               | × |   | × | × |   |   |   |
| <i>Plantago lagopus</i> L.                              |   |   |   | × |   |   |   |
| <i>Platanthera clavellata</i> (Michx.) Luer             |   |   |   | × |   |   |   |
| <i>Poa bulbosa</i> L.                                   | × | × | × | × |   |   |   |
| <i>Poa sinaica</i> Steud.                               |   |   |   |   |   | × |   |
| <i>Polygala monspeliaca</i> L.                          |   |   |   | × |   |   |   |
| <i>Prasium majus</i> L.                                 |   |   | × |   |   | × |   |
| <i>Quercus coccifera</i> L.                             |   |   |   |   |   | × |   |
| <i>Ranunculus asiaticus</i> L.                          | × | × | × | × |   | × |   |
| <i>Ranunculus meifolius</i> Pomel                       |   |   | × |   |   |   |   |
| <i>Reseda lutea</i> L.                                  |   |   |   | × |   |   | × |
| <i>Rhagadiolus edulis</i> Gaertn.                       | × |   |   | × |   |   |   |
| <i>Rhagadiolus stellatus</i> (L.) Gaertn.               |   |   |   |   |   |   | × |
| <i>Rhamnus palaestina</i> Boiss.                        |   |   |   |   | × |   | × |
| <i>Rostraria pumila</i> (Desf.) Tzvelev                 |   | × |   | × |   |   |   |
| <i>Rubia tenuifolia</i> d'Urv.                          |   |   |   |   |   | × |   |
| <i>Salvia dominica</i> L.                               |   |   | × |   |   |   |   |
| <i>Salvia hierosolymitana</i> Boiss.                    |   |   | × | × |   |   | × |
| <i>Salvia indica</i> L.                                 |   |   | × |   | × |   |   |
| <i>Sarcopoterium spinosum</i> (L.) Spach                | × | × |   | × | × |   |   |
| <i>Scandix iberica</i> M.Bieb.                          |   |   |   |   |   | × |   |
| <i>Scandix stellata</i> Banks & Sol.                    |   |   | × |   |   |   |   |
| <i>Scorpiurus muricatus</i> L.                          |   |   |   | × |   | × | × |
| <i>Scrophularia rubricaulis</i> Boiss.                  |   | × |   |   |   |   |   |
| <i>Sedum cespitosum</i> (Cav.) DC.                      |   | × |   |   |   |   |   |
| <i>Sedum microcarpum</i> (Sm.) Schönland                | × |   |   |   |   |   |   |
| <i>Sedum palaestinum</i> Boiss.                         | × |   |   |   |   |   |   |
| <i>Sedum pallidum</i> M.Bieb.                           |   |   |   |   | × |   |   |
| <i>Sedum rubens</i> L.                                  |   |   |   | × |   | × |   |
| <i>Senecio vernalis</i> Waldst. & Kit.                  |   | × | × | × | × |   |   |
| <i>Silene aegyptiaca</i> (L.) L.f.                      |   |   | × |   | × | × |   |
| <i>Silene coniflora</i> Nees ex Otth                    | × | × |   | × |   |   |   |
| <i>Silene macrodonta</i> Boiss.                         |   |   | × |   |   |   |   |
| <i>Silene nocturna</i> L.                               |   | × |   |   |   |   |   |
| <i>Silene palaestina</i> Boiss.                         |   |   |   |   | × |   |   |
| <i>Silene vulgaris</i> (Moench) Garcke                  |   |   |   |   |   | × |   |
| <i>Sinapis alba</i> L.                                  | × |   |   |   |   |   |   |
| <i>Sinapis arvensis</i> L.                              |   |   |   | × |   |   |   |
| <i>Sonchus oleraceus</i> (L.) L.                        | × |   | × | × |   |   |   |
| <i>Stellaria media</i> (L.) Vill.                       | × |   | × | × | × |   |   |
| <i>Stipa capensis</i> Thunb.                            |   |   |   | × |   |   | × |
| <i>Symphytum prachycalyx</i> Boiss.                     |   |   | × |   |   | × |   |
| <i>Teucrium polium</i> L.                               | × | × |   | × | × | × |   |

|                                                                                             |   |   |   |   |   |   |   |
|---------------------------------------------------------------------------------------------|---|---|---|---|---|---|---|
| <i>Theligonum cynocrambe</i> L.                                                             | × |   |   |   |   |   |   |
| <i>Thesium humile</i> Vahl                                                                  |   | × |   |   |   |   |   |
| <i>Thlaspi perfoliatum</i> L.                                                               | × |   | × | × |   | × |   |
| <i>Torilis arvensis</i> (Huds.) Link                                                        |   |   |   |   |   |   | × |
| <i>Torilis leptophylla</i> (L.) Rechb.f.                                                    |   |   |   |   | × |   |   |
| <i>Torilis tenella</i> (Delile) Rechb.f.                                                    | × | × |   | × | × | × |   |
| <i>Tragopogon porrifolius</i> subsp. <i>longirostris</i> (Sch.Bip.)<br><del>Centaurea</del> |   |   |   | × | × |   |   |
| <i>Trifolium campestre</i> Schreb.                                                          |   | × |   | × |   |   |   |
| <i>Trifolium clypeatum</i> L.                                                               |   |   |   |   |   |   | × |
| <i>Trifolium dasyurum</i> C.Presl                                                           |   |   | × |   | × |   |   |
| <i>Trifolium nigrescens</i> Viv.                                                            |   |   | × |   |   |   |   |
| <i>Trifolium pilulare</i> Boiss.                                                            |   |   |   | × |   |   | × |
| <i>Trifolium purpureum</i> Loisel.                                                          |   |   |   |   | × |   | × |
| <i>Trifolium resupinatum</i> L.                                                             |   | × |   |   |   |   |   |
| <i>Trifolium scabrum</i> L.                                                                 |   |   |   |   |   | × |   |
| <i>Trifolium stellatum</i> L.                                                               |   | × |   | × |   | × |   |
| <i>Trigonella foenum-graecum</i> L.                                                         |   |   |   |   |   | × |   |
| <i>Trigonella lilacina</i> Boiss.                                                           |   |   |   | × |   |   |   |
| <i>Tulipa agenensis</i> DC.                                                                 |   |   |   |   |   | × |   |
| <i>Urospermum picroides</i> (L.) Scop. Ex F. W. Schmidt                                     | × | × | × | × |   | × | × |
| <i>Valantia hispida</i> L.                                                                  | × |   |   | × | × |   |   |
| <i>Valerianella coronata</i> (L.) DC.                                                       |   | × |   | × |   |   |   |
| <i>Valerianella muricata</i> (Steven ex M.Bieb.)<br><del>W.H. Denton</del>                  | × | × |   | × |   |   |   |
| <i>Valerianella sclerocarpa</i> Fisch. & C.A.Mey.                                           |   |   |   |   |   | × |   |
| <i>Valerianella vesicaria</i> (L.) Moench                                                   |   |   |   | × | × |   |   |
| <i>Veronica cymbalaria</i> Bodard                                                           |   |   | × |   |   | × |   |
| <i>Veronica persica</i> Poir.                                                               |   | × |   |   |   |   |   |
| <i>Veronica syriaca</i> Roem. & Schult.                                                     |   |   | × |   |   | × |   |
| <i>Vicia hybrida</i> L.                                                                     |   |   |   |   |   | × |   |
| <i>Vicia lutea</i> L.                                                                       |   |   |   |   |   | × |   |
| <i>Vicia narbonensis</i> L.                                                                 |   |   |   |   |   | × |   |
| <i>Vicia palaestina</i> Boiss.                                                              |   |   |   |   | × |   |   |
| <i>Vicia peregrina</i> L.                                                                   | × | × |   |   |   |   |   |
| <i>Vicia sativa</i> L.                                                                      |   |   | × |   |   |   |   |
| <i>Vicia sericocarpa</i> Fenzl                                                              |   |   |   | × |   |   |   |
| <i>Vulpia unilateralis</i> (L.) Stace                                                       |   |   |   |   |   | × |   |
| <i>Ziziphora capitata</i> L.                                                                | × | × |   | × |   |   |   |
